# Supplementary material for: The charge transfer limit of a chemical adduct: the role of perturbation on external potential
Source: Royal Society of Chemistry journal article supplement (doi:10.1039/c7cp01208j), 2017-01-01

## Charge Transfer Limit of a Chemical Adduct: The Role of Perturbation on External Potential

Aabid Hamid, Atul Anand and Ram Kinkar Roy\*

Department of Chemistry, Birla Institute of Technology and Science, Pilani-333031, Rajasthan, India.

\*Corresponding author E-mail: [rkroy2@rediffmail.com](mailto:rkroy2@rediffmail.com), [rkroy@pilani.bits-pilani.ac.in](mailto:rkroy@pilani.bits-pilani.ac.in)

| <b>Table of Contents</b> |                                                                                                                                                    | <b>Page</b> |
|--------------------------|----------------------------------------------------------------------------------------------------------------------------------------------------|-------------|
| <b>Table S1:</b>         | 11 donor and acceptor pairs and their corresponding adducts                                                                                        | 2           |
| <b>Tables S2-S15:</b>    | Optimized coordinates at B3LYP/DNP level of all the chosen donors and acceptors                                                                    | 3-6         |
| <b>Tables S16-S26:</b>   | $\Delta N$ , $\Delta E_{B(A)}$ , $\Delta E_{A(B)}$ and $\Delta E$ values of 11 different donor -acceptor pairs                                     | 7-12        |
| <b>Figures S1-S11:</b>   | Plots showing the profiles of $\Delta E_{B(A)}$ , $\Delta E_{A(B)}$ and $\Delta E$ values with respect to $\Delta N$ for 11 donor -acceptor pairs. | 12-22       |

**Table S1:** 11 donor-acceptor pairs and the corresponding adducts

| S.No. | Donor (B)                                                                                                | Acceptor (A)                                                                                        | Adduct (AB)                                                                                                               |
|-------|----------------------------------------------------------------------------------------------------------|-----------------------------------------------------------------------------------------------------|---------------------------------------------------------------------------------------------------------------------------|
| 1     | 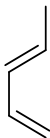<br>(E)-penta-1,3-diene | <br>acrylonitrile | <br>2-methylcyclohex-3-enecarbonitrile |
| 2     | <br>(E)-hexa-1,3-diene  | <br>nitroethene   | <br>3-ethyl-4-nitrocyclohex-1-ene      |
| 3     | (CH <sub>3</sub> ) <sub>2</sub> -NH<br>dimethylamine                                                     | BH <sub>3</sub><br>borane                                                                           | (CH <sub>3</sub> ) <sub>2</sub> -NH-BH <sub>3</sub>                                                                       |
| 4     | (CH <sub>3</sub> ) <sub>3</sub> -N<br>trimethylamine                                                     | BH <sub>3</sub><br>borane                                                                           | (CH <sub>3</sub> ) <sub>3</sub> -N-BH <sub>3</sub>                                                                        |
| 5     | CH <sub>3</sub> -NH <sub>2</sub><br>methanamine                                                          | BH <sub>2</sub> F<br>fluoroborane                                                                   | CH <sub>3</sub> -NH <sub>2</sub> -BH <sub>2</sub> F                                                                       |
| 6     | (CH <sub>3</sub> ) <sub>3</sub> N<br>trimethylamine                                                      | BH <sub>2</sub> F<br>fluoroborane                                                                   | (CH <sub>3</sub> ) <sub>3</sub> N-BH <sub>2</sub> F                                                                       |
| 7     | CH <sub>3</sub> -NH <sub>2</sub><br>methanamine                                                          | BHF <sub>2</sub><br>difluoroborane                                                                  | CH <sub>3</sub> -NH <sub>2</sub> -BHF <sub>2</sub>                                                                        |
| 8     | (CH <sub>3</sub> ) <sub>2</sub> -NH<br>dimethylamine                                                     | BHF <sub>2</sub><br>difluoroborane                                                                  | (CH <sub>3</sub> ) <sub>2</sub> -NH-BHF <sub>2</sub>                                                                      |
| 9     | (CH <sub>3</sub> ) <sub>3</sub> -N<br>trimethylamine                                                     | BHF <sub>2</sub><br>difluoroborane                                                                  | (CH <sub>3</sub> ) <sub>3</sub> -N-BHF <sub>2</sub>                                                                       |
| 10    | (CH <sub>3</sub> ) <sub>2</sub> -NH<br>dimethylamine                                                     | BF <sub>3</sub><br>trifluoroborane                                                                  | (CH <sub>3</sub> ) <sub>2</sub> -NH-BF <sub>3</sub>                                                                       |
| 11    | (CH <sub>3</sub> ) <sub>3</sub> -N<br>trimethylamine                                                     | BF <sub>3</sub><br>trifluoroborane                                                                  | (CH <sub>3</sub> ) <sub>3</sub> -N-BF <sub>3</sub>                                                                        |

**Optimized Coordinates (in Angstroms) of:**

**(1) buta-1,3-diene**

**Table S2:**

|    | ATOM | X         | Y        | Z         |
|----|------|-----------|----------|-----------|
| 1  | C    | -3.398660 | 3.865639 | 0.241773  |
| 2  | C    | -4.252544 | 3.148058 | 0.967702  |
| 3  | C    | -4.017393 | 2.666713 | 2.325109  |
| 4  | C    | -2.851092 | 2.245297 | 2.808754  |
| 5  | H    | -3.629509 | 4.170759 | -0.769672 |
| 6  | H    | -2.439856 | 4.172065 | 0.640877  |
| 7  | H    | -5.225503 | 2.920952 | 0.543487  |
| 8  | H    | -4.888286 | 2.646564 | 2.974098  |
| 9  | H    | -1.964351 | 2.197205 | 2.189023  |
| 10 | H    | -2.752334 | 1.932624 | 3.839553  |

**(2) penta-1,3-diene:**

**Table S3:**

|    | ATOM | X         | Y         | Z         |
|----|------|-----------|-----------|-----------|
| 1  | C    | -5.538530 | 3.364702  | 0.197702  |
| 2  | C    | -5.437316 | 3.154017  | 1.510901  |
| 3  | C    | -4.984961 | 1.910905  | 2.091822  |
| 4  | C    | -4.824853 | 1.695242  | 3.399943  |
| 5  | C    | -4.333761 | 0.421166  | 3.990361  |
| 6  | H    | -5.296096 | 2.586065  | -0.515546 |
| 7  | H    | -5.870552 | 4.310043  | -0.207049 |
| 8  | H    | -5.685674 | 3.952798  | 2.202314  |
| 9  | H    | -4.759921 | 1.106627  | 1.396592  |
| 10 | H    | -5.049521 | 2.500250  | 4.094011  |
| 11 | H    | -4.174342 | -0.339937 | 3.225262  |
| 12 | H    | -5.045270 | 0.021201  | 4.719467  |
| 13 | H    | -3.390950 | 0.563796  | 4.526065  |

**(3) hexa-1,3-diene:**

**Table S4:**

|    | ATOM | X         | Y         | Z         |
|----|------|-----------|-----------|-----------|
| 1  | C    | -5.222622 | 4.332271  | 0.015738  |
| 2  | C    | -5.968058 | 3.491077  | 0.727314  |
| 3  | C    | -5.798440 | 2.043962  | 0.810610  |
| 4  | C    | -4.631109 | 1.396729  | 0.782279  |
| 5  | C    | -4.428633 | -0.083549 | 0.856669  |
| 6  | C    | -5.682507 | -0.931665 | 0.869545  |
| 7  | H    | -4.410013 | 3.979936  | -0.608119 |
| 8  | H    | -5.401619 | 5.399288  | 0.027530  |
| 9  | H    | -6.803029 | 3.897888  | 1.289553  |
| 10 | H    | -6.712030 | 1.471679  | 0.934719  |
| 11 | H    | -3.722787 | 1.988688  | 0.722064  |
| 12 | H    | -3.826107 | -0.305631 | 1.745010  |
| 13 | H    | -3.794454 | -0.386158 | 0.016121  |
| 14 | H    | -5.437337 | -1.992442 | 0.917499  |
| 15 | H    | -6.279353 | -0.769246 | -0.029349 |
| 16 | H    | -6.315256 | -0.701501 | 1.728017  |

(4) acrylaldehyde:

Table S5:

|   | ATOM | X         | Y        | Z         |
|---|------|-----------|----------|-----------|
| 1 | C    | -3.137298 | 3.423200 | -0.255089 |
| 2 | C    | -3.648722 | 3.028538 | 1.058727  |
| 3 | C    | -4.548831 | 2.058567 | 1.189778  |
| 4 | O    | -2.336835 | 4.313342 | -0.440897 |
| 5 | H    | -3.540935 | 2.823677 | -1.103723 |
| 6 | H    | -3.270516 | 3.579755 | 1.918226  |
| 7 | H    | -4.928416 | 1.509088 | 0.328669  |
| 8 | H    | -4.945352 | 1.766769 | 2.160587  |

(5) acrylonitrile:

Table S6:

|   | ATOM | X         | Y         | Z         |
|---|------|-----------|-----------|-----------|
| 1 | C    | -0.103692 | -0.167871 | -0.218337 |
| 2 | C    | -0.294905 | 0.388712  | -1.410128 |
| 3 | C    | -0.704915 | 1.730942  | -1.618995 |
| 4 | N    | -1.067967 | 2.795253  | -1.874694 |
| 5 | H    | 0.181842  | -1.213009 | -0.143164 |
| 6 | H    | -0.252552 | 0.390547  | 0.701577  |
| 7 | H    | -0.144988 | -0.190718 | -2.320247 |

(6) nitroethene:

Table S7:

|   | ATOM | X         | Y        | Z         |
|---|------|-----------|----------|-----------|
| 1 | C    | -0.498637 | 0.964216 | 1.015838  |
| 2 | C    | -1.304231 | 1.772294 | 0.355715  |
| 3 | N    | -1.635110 | 1.558491 | -1.044589 |
| 4 | O    | -1.175883 | 0.587582 | -1.625162 |
| 5 | O    | -2.378828 | 2.394248 | -1.542904 |
| 6 | H    | -0.042596 | 0.107240 | 0.528021  |
| 7 | H    | -0.288156 | 1.143752 | 2.067083  |
| 8 | H    | -1.808405 | 2.641302 | 0.759878  |

(7) borane:

Table S8:

|   | ATOM | X         | Y        | Z         |
|---|------|-----------|----------|-----------|
| 1 | B    | -0.496954 | 1.679149 | -2.543563 |
| 2 | H    | -1.097231 | 0.944625 | -3.278479 |
| 3 | H    | -1.097000 | 2.414206 | -1.809045 |
| 4 | H    | 0.703084  | 1.678692 | -2.543260 |

(8) fluoroborane:

Table S9:

---

| ATOM |   | X         | Y        | Z         |
|------|---|-----------|----------|-----------|
| 1    | B | -4.242761 | 1.295988 | 0.010911  |
| 2    | F | -3.034610 | 1.829697 | -0.126616 |
| 3    | H | -4.513460 | 0.368755 | -0.693023 |
| 4    | H | -4.977757 | 1.792842 | 0.809249  |

---

(9) difluoroborane:

Table S10:

---

| ATOM |   | X         | Y        | Z         |
|------|---|-----------|----------|-----------|
| 1    | B | -7.761826 | 1.798934 | 0.000083  |
| 2    | H | -7.812007 | 0.612657 | 0.000044  |
| 3    | F | -6.595156 | 2.424817 | -0.000135 |
| 4    | F | -8.858396 | 2.539734 | 0.000354  |

---

(10) trifluoroborane:

Table S11:

---

| ATOM |   | X         | Y        | Z         |
|------|---|-----------|----------|-----------|
| 1    | B | -2.359117 | 1.710997 | -0.002532 |
| 2    | F | -1.259763 | 1.135274 | -0.447501 |
| 3    | F | -3.515947 | 1.082970 | -0.081447 |
| 4    | F | -2.298973 | 2.915061 | 0.531098  |

---

(11) ammonia:

Table S12:

---

| ATOM |   | X         | Y        | Z         |
|------|---|-----------|----------|-----------|
| 1    | N | -4.301945 | 1.577230 | 0.503714  |
| 2    | H | -4.613023 | 1.873157 | -0.414423 |
| 3    | H | -4.612678 | 2.292495 | 1.150893  |
| 4    | H | -3.290141 | 1.631256 | 0.489550  |

---

(12) methanamine:

Table S13:

|   | ATOM | X         | Y         | Z         |
|---|------|-----------|-----------|-----------|
| 1 | C    | -4.293085 | 0.801418  | 0.033553  |
| 2 | N    | -3.033616 | 1.527312  | 0.043593  |
| 3 | H    | -4.098354 | -0.271725 | 0.026881  |
| 4 | H    | -4.837813 | 1.028766  | -0.883591 |
| 5 | H    | -4.967349 | 1.010064  | 0.875993  |
| 6 | H    | -2.514118 | 1.319918  | 0.886899  |
| 7 | H    | -3.200364 | 2.525393  | 0.049981  |

(13) dimethylamine:

Table S14:

|    | ATOM | X         | Y         | Z         |
|----|------|-----------|-----------|-----------|
| 1  | N    | -3.952074 | 0.843632  | 0.263242  |
| 2  | C    | -4.253812 | -0.546526 | -0.024196 |
| 3  | C    | -5.077327 | 1.726840  | 0.012986  |
| 4  | H    | -3.401157 | -1.170664 | 0.242434  |
| 5  | H    | -4.426257 | -0.666051 | -1.096503 |
| 6  | H    | -5.141120 | -0.933312 | 0.501698  |
| 7  | H    | -5.994606 | 1.451457  | 0.557042  |
| 8  | H    | -5.309729 | 1.715909  | -1.054246 |
| 9  | H    | -4.813332 | 2.750161  | 0.277692  |
| 10 | H    | -3.655625 | 0.933017  | 1.226163  |

(14) trimethylamine:

Table S15:

|    | ATOM | X         | Y        | Z         |
|----|------|-----------|----------|-----------|
| 1  | N    | -4.730219 | 2.153484 | 0.286020  |
| 2  | C    | -3.606791 | 2.950340 | -0.171639 |
| 3  | C    | -5.999315 | 2.783475 | -0.027564 |
| 4  | C    | -4.671322 | 0.805570 | -0.245489 |
| 5  | H    | -3.591308 | 3.078400 | -1.268801 |
| 6  | H    | -2.672799 | 2.469498 | 0.121906  |
| 7  | H    | -3.637139 | 3.937705 | 0.288728  |
| 8  | H    | -6.814447 | 2.194708 | 0.394492  |
| 9  | H    | -6.170002 | 2.878843 | -1.114490 |
| 10 | H    | -6.032507 | 3.779558 | 0.413032  |
| 11 | H    | -4.724281 | 0.776183 | -1.349119 |
| 12 | H    | -5.495329 | 0.211052 | 0.149873  |
| 13 | H    | -3.740040 | 0.326006 | 0.058173  |

**Table S16.** Changes in  $\Delta E_{B(A)}$ ,  $\Delta E_{A(B)}$  and  $\Delta E$  values with respect to charge transfer ( $\Delta N$ ) for Diels-Alder pair acrylonitrile ( $\text{CH}_2=\text{CH-CN}$ , A) and penta-1,3-diene ( $\text{CH}_2=\text{CH-CH=CH-CH}_3$ , B).

| S.No. | $\Delta N$ | $\Delta E_{B(A)}$ (kJ mol <sup>-1</sup> ) | $\Delta E_{A(B)}$ (kJ mol <sup>-1</sup> ) | $\Delta E$ (kJ mol <sup>-1</sup> ) |
|-------|------------|-------------------------------------------|-------------------------------------------|------------------------------------|
| 1     | 0.00000    | 000.000                                   | 0000.000                                  | 0000.000                           |
| 2     | 0.01929    | 006.478                                   | -009.153                                  | -002.675                           |
| 3     | 0.03929    | 013.387                                   | -018.414                                  | -005.027                           |
| 4     | 0.05929    | 020.492                                   | -027.444                                  | -006.952                           |
| 5     | 0.07929    | 027.794                                   | -036.243                                  | -008.449                           |
| 6     | 0.09929    | 035.293                                   | -044.811                                  | -009.518                           |
| 7     | 0.11929    | 042.988                                   | -053.148                                  | -010.160                           |
| 8*    | 0.13929    | 050.75                                    | -061.12                                   | -010.370                           |
| 9     | 0.15929    | 058.969                                   | -069.129                                  | -010.160                           |
| 10    | 0.17929    | 067.254                                   | -076.772                                  | -009.518                           |
| 11    | 0.19929    | 075.737                                   | -084.185                                  | -008.448                           |
| 12    | 0.21929    | 084.416                                   | -091.367                                  | -006.951                           |
| 13    | 0.23929    | 093.291                                   | -098.318                                  | -005.027                           |
| 14    | 0.25929    | 102.364                                   | -105.038                                  | -002.674                           |
| 15    | 0.27859    | 111.302                                   | -111.302                                  | -000.000                           |

\* The  $\Delta N_{eqm}$  value is 0.139 (when  $\Delta E = \Delta E_{SE(AB)}$  i.e., the most negative)

**Table S17.** Change in  $\Delta E_{B(A)}$ ,  $\Delta E_{A(B)}$  and  $\Delta E$  values with respect to the charge transfer ( $\Delta N$ ) for Diels-Alder pair nitroethene ( $\text{CH}_2=\text{CHNO}_2$ , A) and hexa-1,3-diene ( $\text{CH}_2=\text{CH-CH=CH-C}_2\text{H}_5$ , B).

| S. No. | $\Delta N$ | $\Delta E_{B(A)}$ (kJ mol <sup>-1</sup> ) | $\Delta E_{A(B)}$ (kJ mol <sup>-1</sup> ) | $\Delta E$ (kJ mol <sup>-1</sup> ) |
|--------|------------|-------------------------------------------|-------------------------------------------|------------------------------------|
| 1      | 0.00000    | 000.000                                   | 0000.000                                  | 000.000                            |
| 2      | 0.02474    | 008.250                                   | -013.186                                  | -04.936                            |
| 3      | 0.06474    | 022.217                                   | -033.790                                  | -11.573                            |
| 4      | 0.10474    | 036.963                                   | -053.514                                  | -16.551                            |
| 5      | 0.14474    | 052.488                                   | -072.357                                  | -19.869                            |
| 6      | 0.18474    | 068.793                                   | -090.321                                  | -21.521                            |
| 7*     | 0.205      | 77.33                                     | -99.06                                    | -21.73                             |
| 8      | 0.22474    | 085.876                                   | -107.405                                  | -21.529                            |
| 9      | 0.26474    | 103.739                                   | -123.609                                  | -19.870                            |
| 10     | 0.30474    | 122.382                                   | -138.933                                  | -16.551                            |
| 11     | 0.34474    | 141.803                                   | -153.376                                  | -11.573                            |
| 12     | 0.38474    | 162.004                                   | -166.940                                  | -04.936                            |
| 13     | 0.40949    | 174.891                                   | -174.890                                  | 000.000                            |

\* The  $\Delta N_{eqm}$  value is 0.205 (when  $\Delta E = \Delta E_{SE(AB)}$  i.e., the most negative).

**Table S18.** Changes in  $\Delta E_{B(A)}$ ,  $\Delta E_{A(B)}$  and  $\Delta E$  values with respect to charge transfer ( $\Delta N$ ) for borane ( $\text{BH}_3$ , A) and dimethylamine [ $(\text{CH}_3)_2\text{-NH}$ , B].

| S. No. | $\Delta N$ | $\Delta E_{B(A)}$ (kJ mol <sup>-1</sup> ) | $\Delta E_{A(B)}$ (kJ mol <sup>-1</sup> ) | $\Delta E$ (kJ mol <sup>-1</sup> ) |
|--------|------------|-------------------------------------------|-------------------------------------------|------------------------------------|
| 1      | 0.00000    | 0.00000                                   | 0.00000                                   | 0.00000                            |
| 2      | 0.01118    | 2.25374                                   | -3.3886                                   | -1.13486                           |
| 3      | 0.04118    | 8.69074                                   | -12.2139                                  | -3.52316                           |
| 4      | 0.07118    | 15.69853                                  | -20.65467                                 | -4.95614                           |
| 5*     | 0.10118    | 23.27711                                  | -28.71092                                 | -5.4338                            |
| 6      | 0.13118    | 31.42649                                  | -36.38263                                 | -4.95614                           |
| 7      | 0.16118    | 40.14666                                  | -43.66983                                 | -3.52316                           |
| 8      | 0.19118    | 49.43763                                  | -50.57249                                 | -1.13486                           |
| 9      | 0.20236    | 53.04962                                  | -53.04962                                 | 0.00000                            |

\* The  $\Delta N_{eqm}$  value is 0.10118 (when  $\Delta E = \Delta E_{SE(AB)}$  i.e., the most negative).

**Table S19.** Changes in  $\Delta E_{B(A)}$ ,  $\Delta E_{A(B)}$  and  $\Delta E$  values with respect to charge transfer ( $\Delta N$ ) for borane ( $\text{BH}_3$ , A) and trimethylamine [ $(\text{CH}_3)_3\text{-N}$ , B].

| S. No. | $\Delta N$ | $\Delta E_{B(A)}$ (kJ mol <sup>-1</sup> ) | $\Delta E_{A(B)}$ (kJ mol <sup>-1</sup> ) | $\Delta E$ (kJ mol <sup>-1</sup> ) |
|--------|------------|-------------------------------------------|-------------------------------------------|------------------------------------|
| 1      | 0.00000    | 0.00000                                   | 0.00000                                   | 0.00000                            |
| 2      | 0.01435    | 2.0702                                    | -4.33822                                  | -2.26802                           |
| 3      | 0.04435    | 6.78261                                   | -13.12293                                 | -6.34033                           |
| 4      | 0.07435    | 12.01544                                  | -21.52312                                 | -9.50768                           |
| 5      | 0.10435    | 17.76871                                  | -29.53878                                 | -11.77007                          |
| 6      | 0.13435    | 24.0424                                   | -37.16991                                 | -13.12751                          |
| 7*     | 0.16435    | 30.83653                                  | -44.41652                                 | -13.57999                          |
| 8      | 0.19435    | 38.15109                                  | -51.2786                                  | -13.12751                          |
| 9      | 0.22435    | 45.98608                                  | -57.75616                                 | -11.77007                          |
| 10     | 0.25435    | 54.34151                                  | -63.84919                                 | -9.50768                           |
| 11     | 0.28435    | 63.21736                                  | -69.55769                                 | -6.34033                           |
| 12     | 0.31435    | 72.61365                                  | -74.88166                                 | -2.26802                           |
| 13     | 0.328706   | 77.29466                                  | -77.29466                                 | 0.00000                            |

\* The  $\Delta N_{eqm}$  value is 0.16435 (when  $\Delta E = \Delta E_{SE(AB)}$  i.e., the most negative).



**Table S20.** Changes in  $\Delta E_{B(A)}$ ,  $\Delta E_{A(B)}$  and  $\Delta E$  values with respect to charge transfer ( $\Delta N$ ) for fluoroborane ( $\text{BH}_2\text{F}$ , A) and methanamine ( $\text{CH}_3\text{-NH}_2$ , B).

| S. No. | $\Delta N$ | $\Delta E_{B(A)}$ (kJ mol <sup>-1</sup> ) | $\Delta E_{A(B)}$ (kJ mol <sup>-1</sup> ) | $\Delta E$ (kJ mol <sup>-1</sup> ) |
|--------|------------|-------------------------------------------|-------------------------------------------|------------------------------------|
| 1      | 0.01611    | 3.80382                                   | -8.63063                                  | -4.82681                           |
| 2      | 0.05611    | 14.00859                                  | -29.20479                                 | -15.1962                           |
| 3      | 0.09611    | 25.29615                                  | -48.55743                                 | -23.26129                          |
| 4      | 0.13611    | 37.66649                                  | -66.68855                                 | -29.02206                          |
| 5      | 0.17611    | 51.11961                                  | -83.59814                                 | -32.47853                          |
| 6*     | 0.21611    | 65.65552                                  | -99.28621                                 | -33.63068                          |
| 7      | 0.25611    | 81.27422                                  | -113.75275                                | -32.47853                          |
| 8      | 0.29611    | 97.97571                                  | -126.99777                                | -29.02206                          |
| 9      | 0.33611    | 115.75998                                 | -139.02127                                | -23.26129                          |
| 10     | 0.37611    | 134.62703                                 | -149.82324                                | -15.1962                           |
| 11     | 0.41611    | 154.57688                                 | -159.40369                                | -4.82681                           |
| 12     | 0.43222    | 162.92064                                 | -162.92064                                | 0.00000                            |

\* The  $\Delta N_{eqm}$  value is 0.21611 (when  $\Delta E = \Delta E_{SE(AB)}$  i.e., the most negative).

**Table S21.** Changes in  $\Delta E_{B(A)}$ ,  $\Delta E_{A(B)}$  and  $\Delta E$  values with respect to charge transfer ( $\Delta N$ ) for fluoroborane ( $\text{BH}_2\text{F}$ , A) and trimethylamine [ $(\text{CH}_3)_3\text{-N}$ , B].

| S. No. | $\Delta N$ | $\Delta E_{B(A)}$ (kJ mol <sup>-1</sup> ) | $\Delta E_{A(B)}$ (kJ mol <sup>-1</sup> ) | $\Delta E$ (kJ mol <sup>-1</sup> ) |
|--------|------------|-------------------------------------------|-------------------------------------------|------------------------------------|
| 1      | 0.05948    | 9.35631                                   | -30.88241                                 | -21.5261                           |
| 2      | 0.11948    | 20.86728                                  | -59.29893                                 | -38.43164                          |
| 3      | 0.17948    | 34.45998                                  | -84.96701                                 | -50.50703                          |
| 4      | 0.23948    | 50.13441                                  | -107.88667                                | -57.75226                          |
| 5*     | 0.29948    | 67.89056                                  | -128.05789                                | -60.16734                          |
| 6      | 0.35948    | 87.72843                                  | -145.48069                                | -57.75226                          |
| 7      | 0.41948    | 109.64804                                 | -160.15506                                | -50.50703                          |
| 8      | 0.47948    | 133.64936                                 | -172.08101                                | -38.43164                          |
| 9      | 0.53948    | 159.73242                                 | -181.25852                                | -21.5261                           |
| 10     | 0.59896    | 187.64488                                 | -187.64488                                | 0.00000                            |

\* The  $\Delta N_{eqm}$  value is 0.29948 (when  $\Delta E = \Delta E_{SE(AB)}$  i.e., the most negative).

**Table S22.** Changes in  $\Delta E_{B(A)}$ ,  $\Delta E_{A(B)}$  and  $\Delta E$  values with respect to charge transfer ( $\Delta N$ ) for difluoroborane ( $\text{BHF}_2$ , A) and methanamine ( $\text{CH}_3\text{-NH}_2$ , B).

| S. No. | $\Delta N$ | $\Delta E_{B(A)}$ (kJ mol <sup>-1</sup> ) | $\Delta E_{A(B)}$ (kJ mol <sup>-1</sup> ) | $\Delta E$ (kJ mol <sup>-1</sup> ) |
|--------|------------|-------------------------------------------|-------------------------------------------|------------------------------------|
| 1      | 0.04314    | 10.58259                                  | -25.09882                                 | -14.51622                          |
| 2      | 0.09314    | 24.42256                                  | -52.22554                                 | -27.80299                          |
| 3      | 0.14314    | 39.95437                                  | -77.2479                                  | -37.29354                          |
| 4      | 0.19314    | 57.17803                                  | -100.1659                                 | -42.98786                          |
| 5*     | 0.24314    | 76.09355                                  | -120.97953                                | -44.88597                          |
| 6      | 0.29314    | 96.70093                                  | -139.68879                                | -42.98786                          |
| 7      | 0.34314    | 119.00015                                 | -156.29369                                | -37.29354                          |
| 8      | 0.39314    | 142.99123                                 | -170.79422                                | -27.80299                          |
| 9      | 0.44314    | 168.67416                                 | -183.19039                                | -14.51622                          |
| 10     | 0.48628    | 192.19294                                 | -192.19294                                | 0.00000                            |

\* The  $\Delta N_{eqm}$  value is 0.24314 (when  $\Delta E = \Delta E_{SE(AB)}$  i.e., the most negative).

**Table S23.** Changes in  $\Delta E_{B(A)}$ ,  $\Delta E_{A(B)}$  and  $\Delta E$  values with respect to charge transfer ( $\Delta N$ ) for difluoroborane ( $\text{BHF}_2$ , A) and dimethylamine [ $(\text{CH}_3)_2\text{-NH}$ , B].

| S. No. | $\Delta N$ | $\Delta E_{B(A)}$ (kJ mol <sup>-1</sup> ) | $\Delta E_{A(B)}$ (kJ mol <sup>-1</sup> ) | $\Delta E$ (kJ mol <sup>-1</sup> ) |
|--------|------------|-------------------------------------------|-------------------------------------------|------------------------------------|
| 1      | 0.03232    | 6.72949                                   | -18.94942                                 | -12.21994                          |
| 2      | 0.11232    | 26.23564                                  | -62.07096                                 | -35.83532                          |
| 3      | 0.19232    | 49.80078                                  | -99.80533                                 | -50.00455                          |
| 4*     | 0.27232    | 77.42489                                  | -132.15252                                | -54.72763                          |
| 5      | 0.35232    | 109.10798                                 | -159.11253                                | -50.00455                          |
| 6      | 0.43232    | 144.85004                                 | -180.68537                                | -35.83532                          |
| 7      | 0.51232    | 184.65109                                 | -196.87103                                | -12.21994                          |
| 8      | 0.54465    | 201.88698                                 | -201.88698                                | 0.000000                           |

\* The  $\Delta N_{eqm}$  value is 0.27232 (when  $\Delta E = \Delta E_{SE(AB)}$  i.e., the most negative).

**Table S24.** Changes in  $\Delta E_{B(A)}$ ,  $\Delta E_{A(B)}$  and  $\Delta E$  values with respect to charge transfer ( $\Delta N$ ) for difluoroborane ( $\text{BHF}_2$ , A) and trimethylamine  $[(\text{CH}_3)_3\text{-N}$ , B].

| S. No. | $\Delta N$ | $\Delta E_{B(A)}$ (kJ mol <sup>-1</sup> ) | $\Delta E_{A(B)}$ (kJ mol <sup>-1</sup> ) | $\Delta E$ (kJ mol <sup>-1</sup> ) |
|--------|------------|-------------------------------------------|-------------------------------------------|------------------------------------|
| 1      | 0.02379    | 3.49727                                   | -14.03508                                 | -10.53781                          |
| 2      | 0.08379    | 13.77011                                  | -47.31197                                 | -33.54186                          |
| 3      | 0.14379    | 26.12468                                  | -77.55858                                 | -51.4339                           |
| 4      | 0.20379    | 40.56097                                  | -104.7749                                 | -64.21393                          |
| 5      | 0.26379    | 57.07899                                  | -128.96094                                | -71.88195                          |
| 6*     | 0.32379    | 75.67873                                  | -150.11668                                | -74.43796                          |
| 7      | 0.38379    | 96.3602                                   | -168.24215                                | -71.88195                          |
| 8      | 0.44379    | 119.12339                                 | -183.33732                                | -64.21393                          |
| 9      | 0.50379    | 143.96831                                 | -195.40221                                | -51.4339                           |
| 10     | 0.56379    | 170.89495                                 | -204.43681                                | -33.54186                          |
| 11     | 0.62379    | 199.90332                                 | -210.44113                                | -10.53781                          |
| 12     | 0.64758    | 211.98319                                 | -211.98319                                | 0                                  |

\* The  $\Delta N_{eqm}$  value is 0.32379 (when  $\Delta E = \Delta E_{SE(AB)}$  i.e., the most negative).

**Table S25.** Changes in  $\Delta E_{B(A)}$ ,  $\Delta E_{A(B)}$  and  $\Delta E$  values with respect to charge transfer ( $\Delta N$ ) for trifluoroborane ( $\text{BF}_3$ , A) and dimethylamine  $[(\text{CH}_3)_2\text{NH}$ , B].

| S. No. | $\Delta N$ | $\Delta E_{B(A)}$ (kJ mol <sup>-1</sup> ) | $\Delta E_{A(B)}$ (kJ mol <sup>-1</sup> ) | $\Delta E$ (kJ mol <sup>-1</sup> ) |
|--------|------------|-------------------------------------------|-------------------------------------------|------------------------------------|
| 1      | 0.03249    | 6.76577                                   | -19.51961                                 | -12.75385                          |
| 2      | 0.11249    | 26.28035                                  | -63.54746                                 | -37.26712                          |
| 3      | 0.19249    | 49.8539                                   | -101.82898                                | -51.97508                          |
| 4*     | 0.27249    | 77.48644                                  | -134.36417                                | -56.87773                          |
| 5      | 0.35249    | 109.17795                                 | -161.15303                                | -51.97508                          |
| 6      | 0.43249    | 144.92845                                 | -182.19556                                | -37.26712                          |
| 7      | 0.51249    | 184.73792                                 | -197.49176                                | -12.75385                          |
| 8      | 0.54499    | 202.06461                                 | -202.06461                                | 0.000000                           |

\* The  $\Delta N_{eqm}$  value is 0.27249 (when  $\Delta E = \Delta E_{SE(AB)}$  i.e., the most negative).

**Table S26.** Changes in  $\Delta E_{B(A)}$ ,  $\Delta E_{A(B)}$  and  $\Delta E$  values with respect to charge transfer ( $\Delta N$ ) for trifluoroborane ( $\text{BF}_3$ , A) and trimethylamine [ $(\text{CH}_3)_3\text{-N}$ , B].

| S. No. | $\Delta N$ | $\Delta E_{B(A)}$ (kJ mol <sup>-1</sup> ) | $\Delta E_{A(B)}$ (kJ mol <sup>-1</sup> ) | $\Delta E$ (kJ mol <sup>-1</sup> ) |
|--------|------------|-------------------------------------------|-------------------------------------------|------------------------------------|
| 1      | 0.00201    | 0.28258                                   | -1.23432                                  | -0.95174                           |
| 2      | 0.08201    | 13.43455                                  | -47.4514                                  | -34.01685                          |
| 3      | 0.16201    | 30.28735                                  | -87.92214                                 | -57.63479                          |
| 4      | 0.24201    | 50.84101                                  | -122.64656                                | -71.80555                          |
| 5*     | 0.32201    | 75.09551                                  | -151.62465                                | -76.52914                          |
| 6      | 0.40201    | 103.05085                                 | -174.8564                                 | -71.80555                          |
| 7      | 0.48201    | 134.70704                                 | -192.34183                                | -57.63479                          |
| 8      | 0.56201    | 170.06408                                 | -204.08093                                | -34.01685                          |
| 9      | 0.64201    | 209.12196                                 | -210.0737                                 | -0.95174                           |
| 10     | 0.64401    | 210.14996                                 | -210.14996                                | 0.00000                            |

\* The  $\Delta N_{eqm}$  value is 0.32201 (when  $\Delta E = \Delta E_{SE(AB)}$  i.e., the most negative).

**Figure S1.** Plot showing the profiles of  $\Delta E_{B(A)}$ ,  $\Delta E_{A(B)}$  and  $\Delta E$  with respect to  $\Delta N$  for penta-1, 3-diene (B) and acrylonitrile (A).

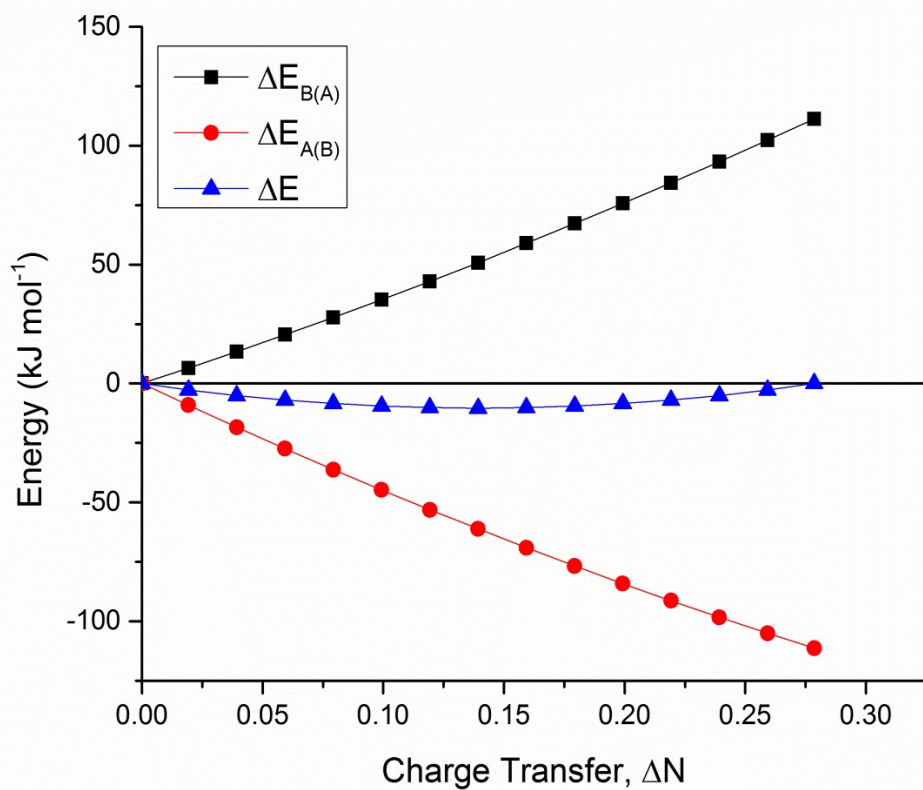

**Figure S2.** Plot showing the profiles of  $\Delta E_{B(A)}$ ,  $\Delta E_{A(B)}$  and  $\Delta E$  with respect to  $\Delta N$  for hexa-1, 3-diene (B) and nitroethene (A).

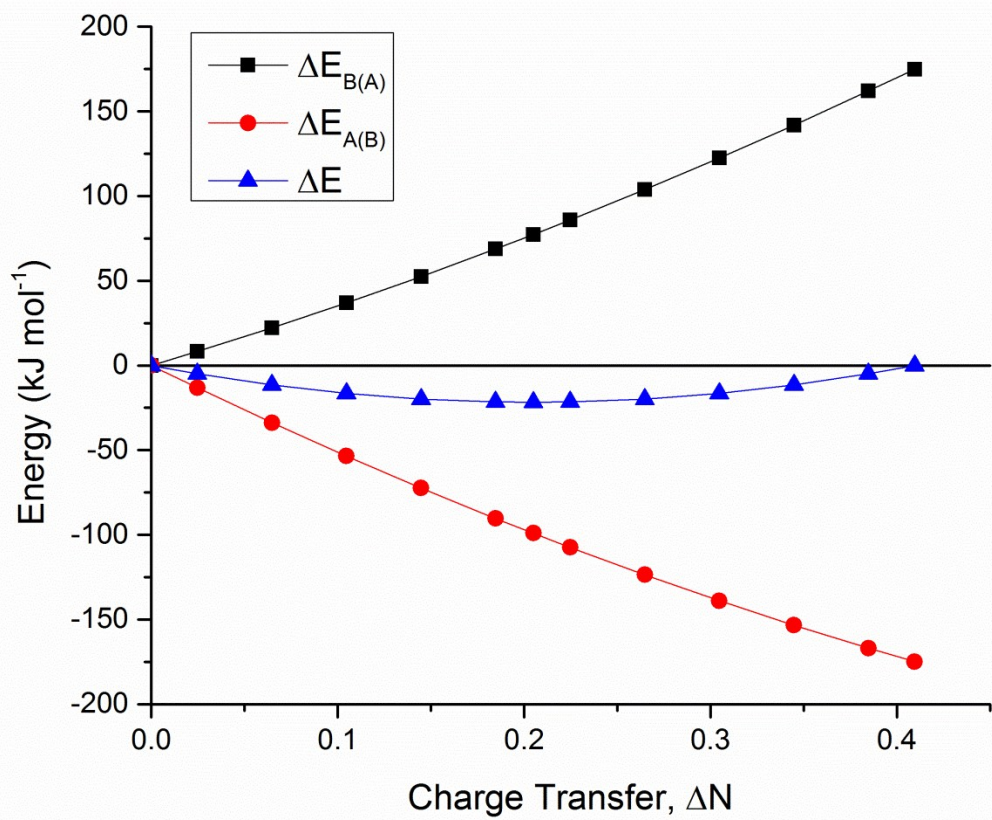

**Figure S3.** Plot showing the profiles of  $\Delta E_{B(A)}$ ,  $\Delta E_{A(B)}$  and  $\Delta E$  with respect to  $\Delta N$  for dimethylamine (B) and borane (A).

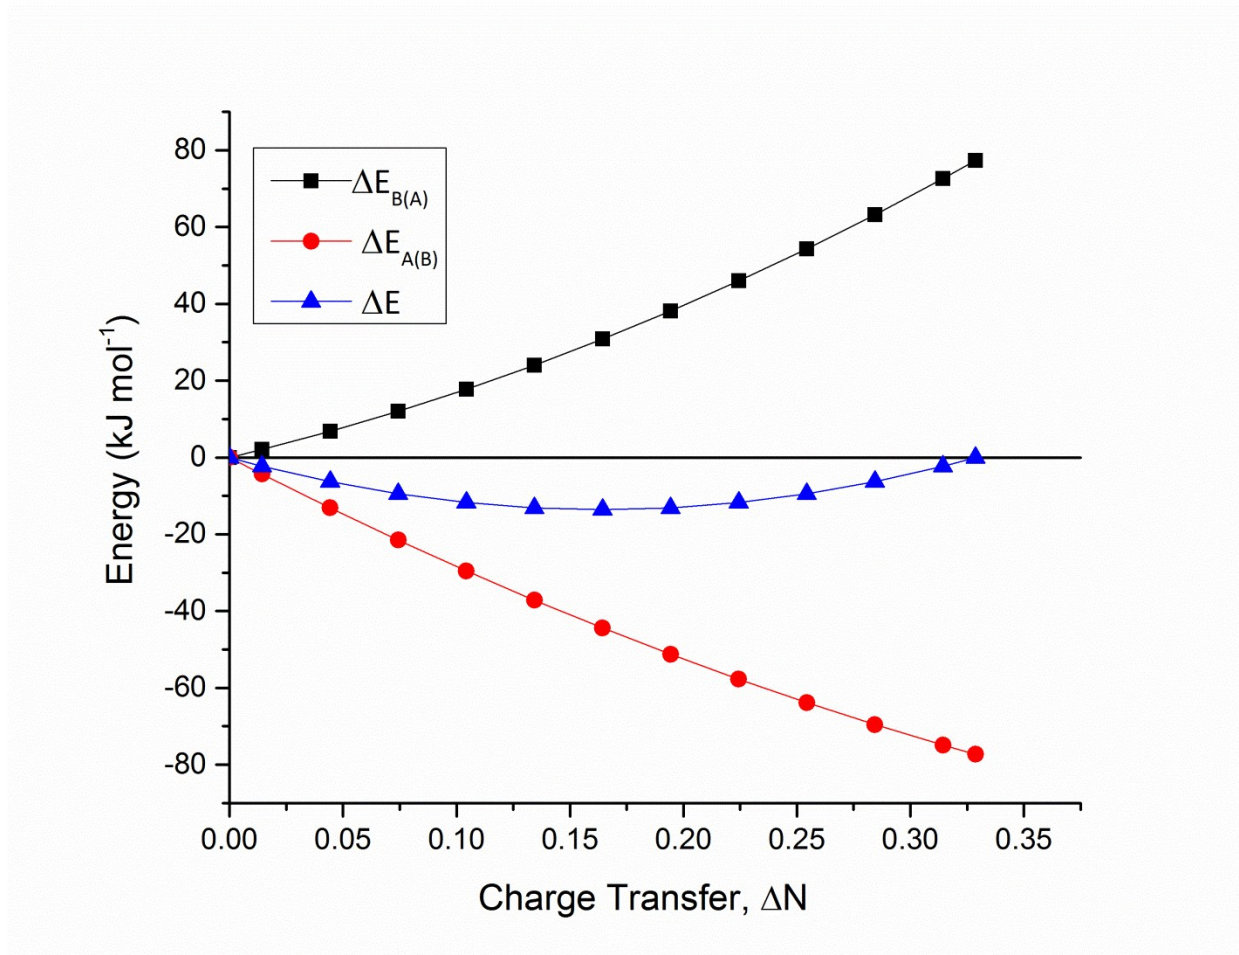



**Figure S4.** Plot showing the profiles of  $\Delta E_{B(A)}$ ,  $\Delta E_{A(B)}$  and  $\Delta E$  with respect to  $\Delta N$  for trimethylamine (B) and borane (A).

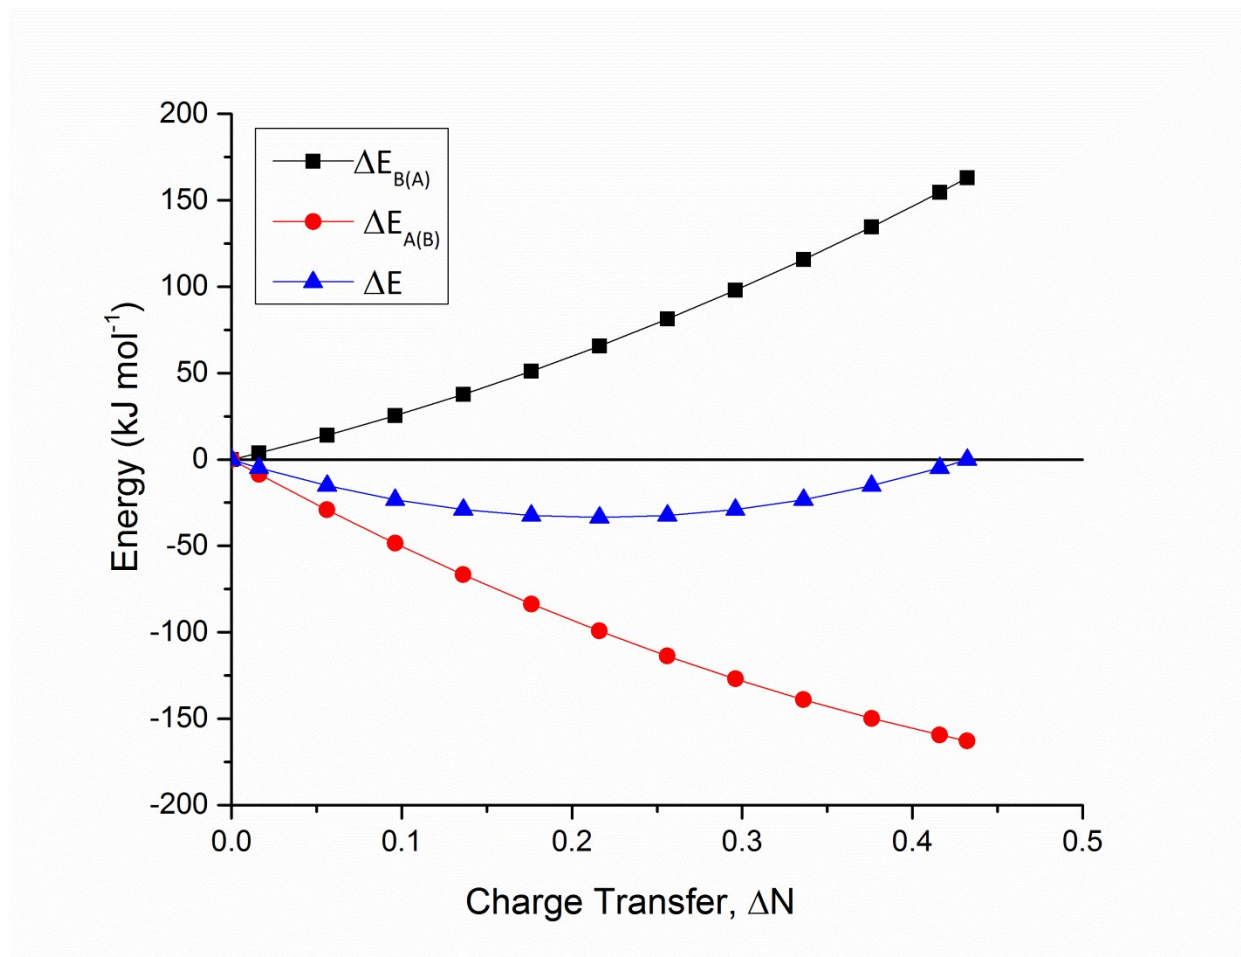



**Figure S5.** Plot showing the profiles of  $\Delta E_{B(A)}$ ,  $\Delta E_{A(B)}$  and  $\Delta E$  with respect to  $\Delta N$  for methanamine (B) and fluoroborane (A).

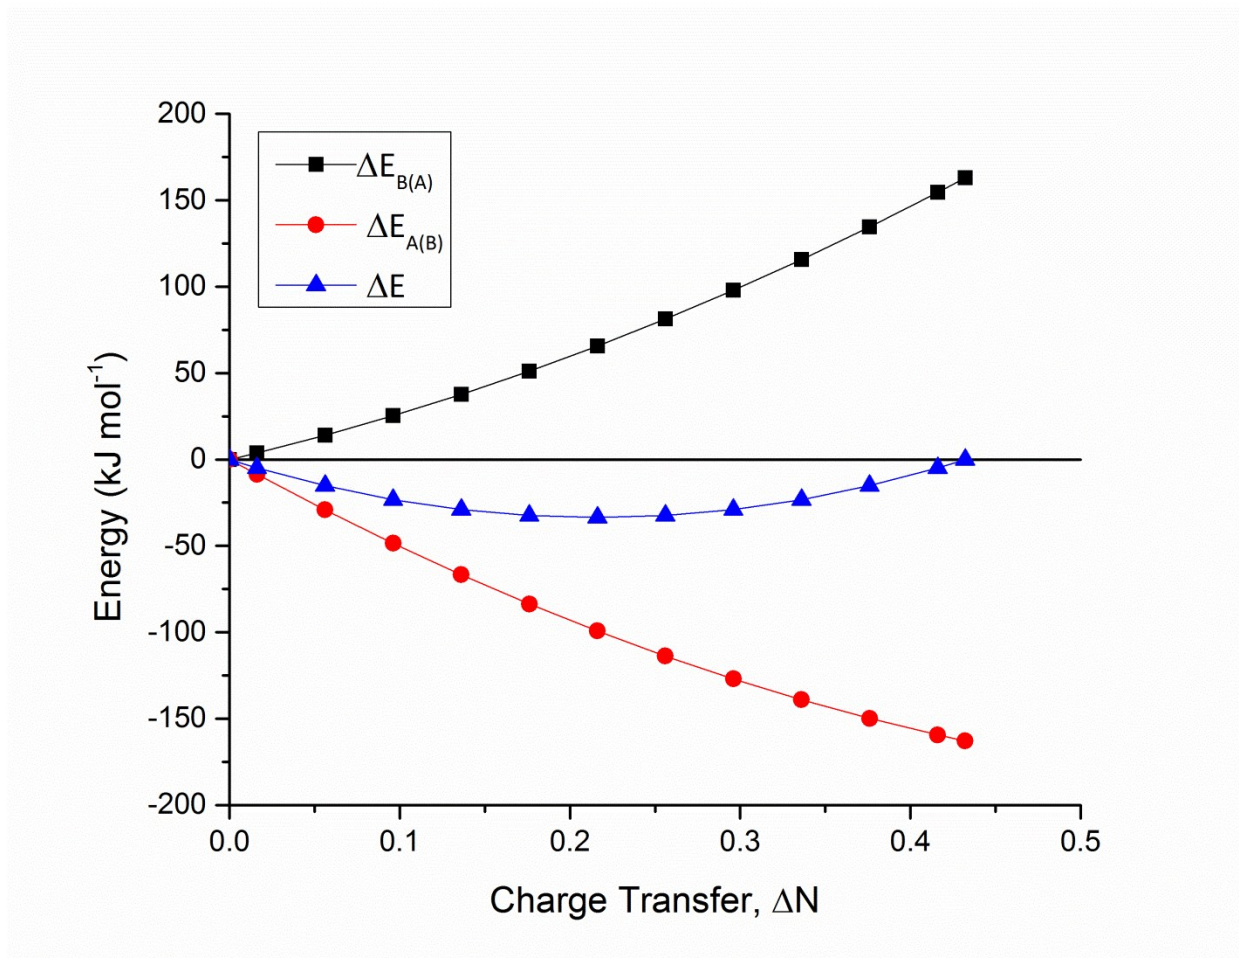

**Figure S6.** Plot showing the profiles of  $\Delta E_{B(A)}$ ,  $\Delta E_{A(B)}$  and  $\Delta E$  with respect to  $\Delta N$  for trimethylamine (B) and fluoroborane (A).

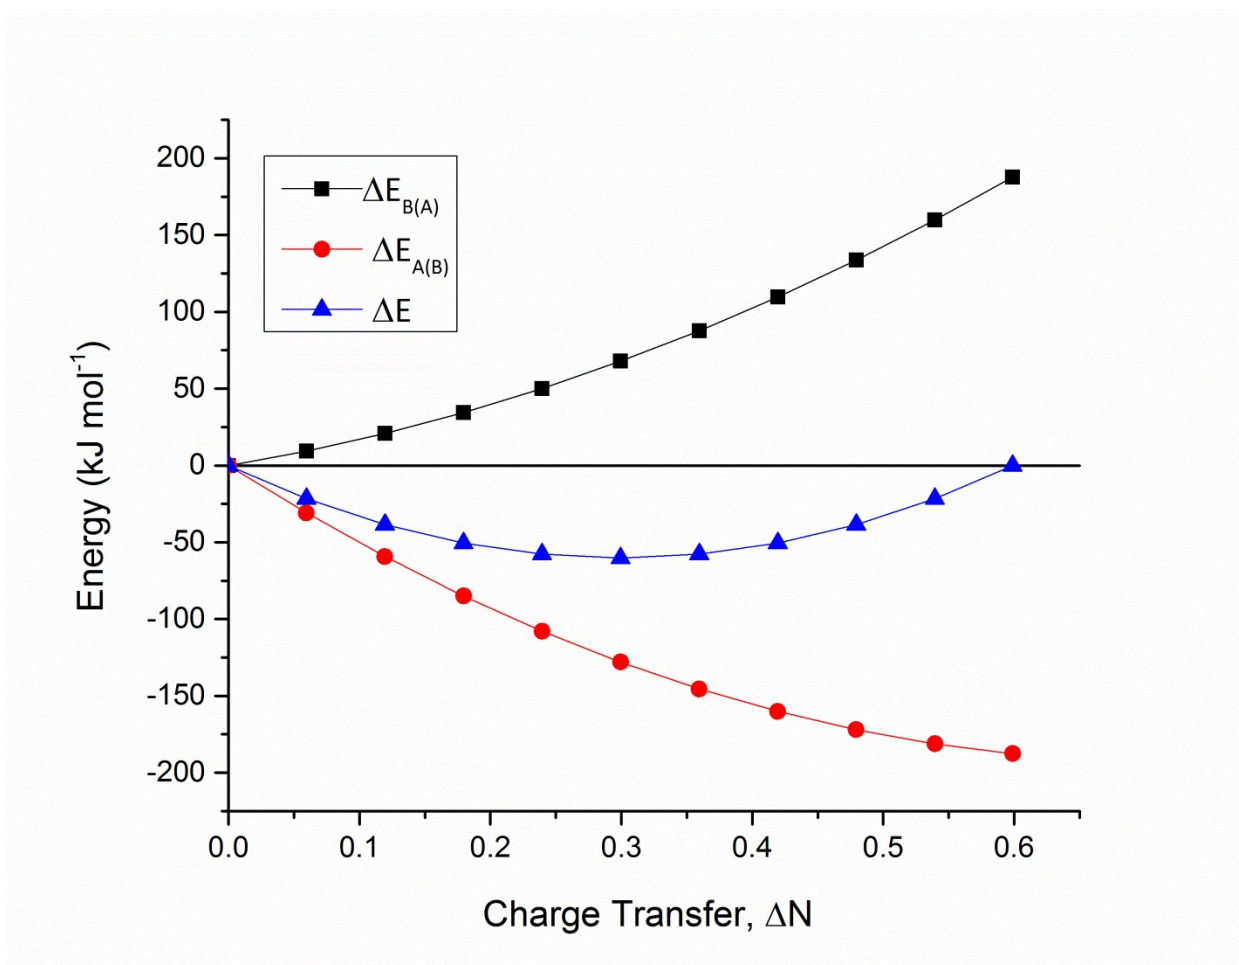

**Figure S7.** Plot showing the profiles of  $\Delta E_{B(A)}$ ,  $\Delta E_{A(B)}$  and  $\Delta E$  values with respect to  $\Delta N$  for methanamine (B) and difluoroborane (A).

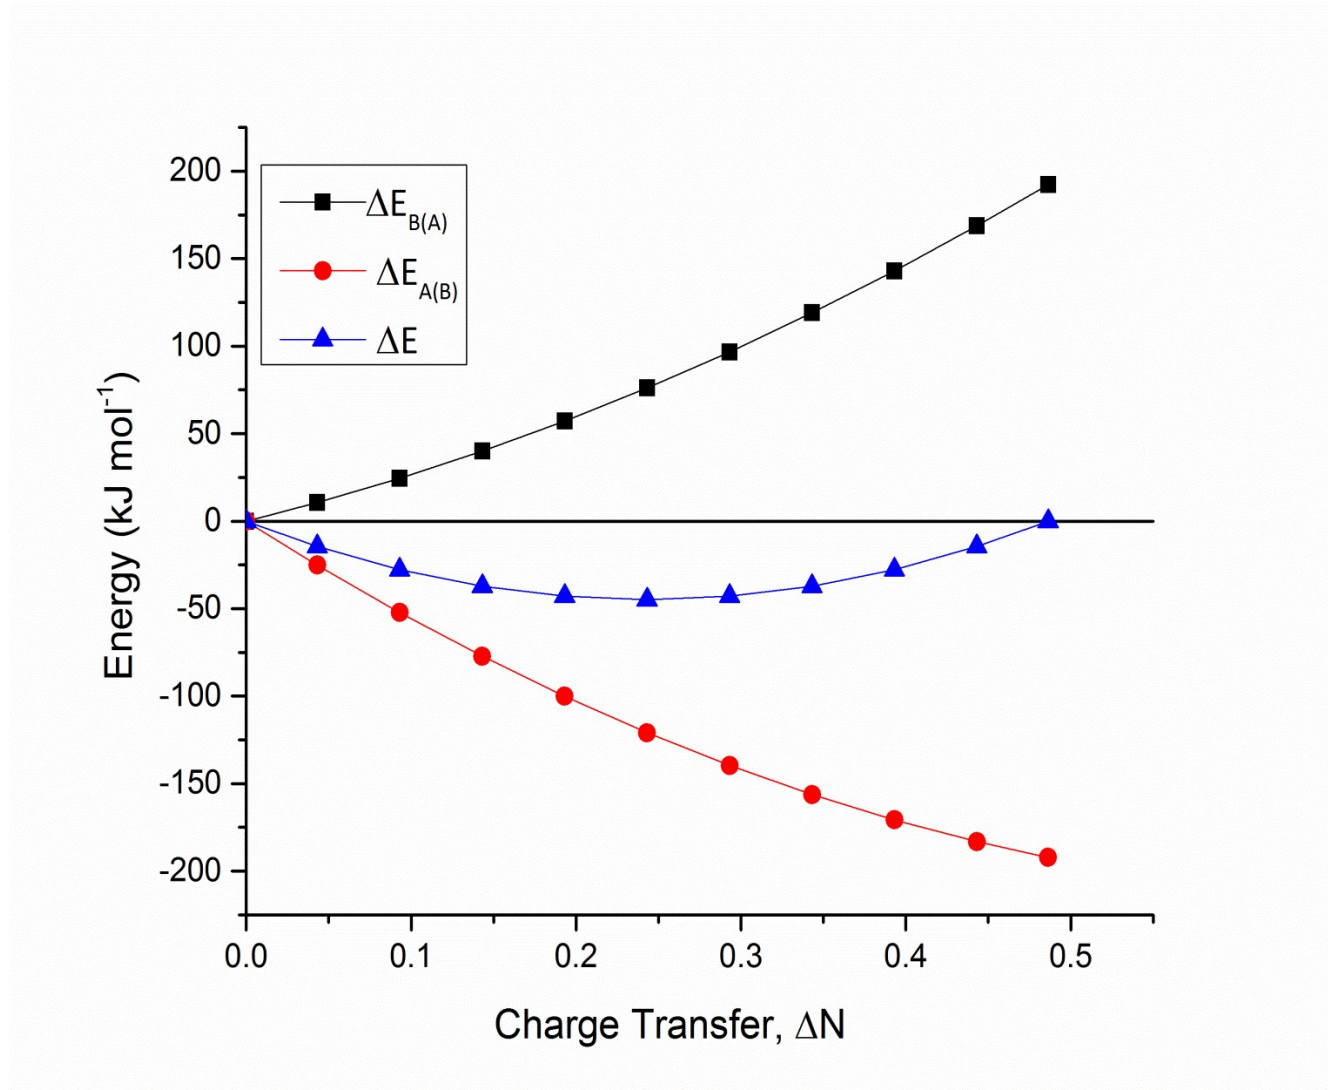



**Figure S8.** Plot showing the profiles of  $\Delta E_{B(A)}$ ,  $\Delta E_{A(B)}$  and  $\Delta E$  with respect to  $\Delta N$  for dimethylamine (B) and difluoroborane (A)

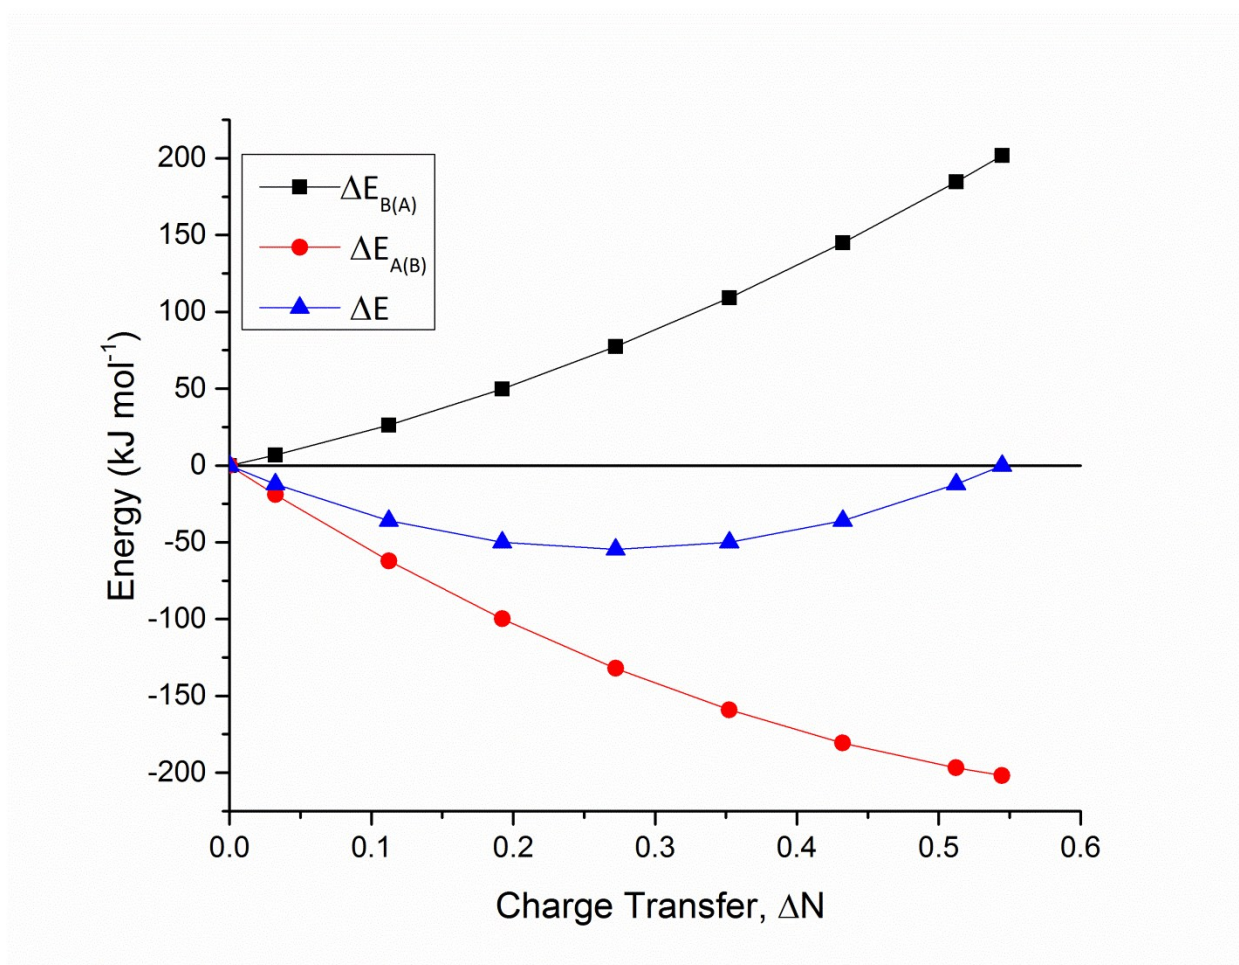

**Figure S9.** Plot showing the profiles of  $\Delta E_{B(A)}$ ,  $\Delta E_{A(B)}$  and  $\Delta E$  with respect to  $\Delta N$  for trimethylamine (B) and difluoroborane (A).

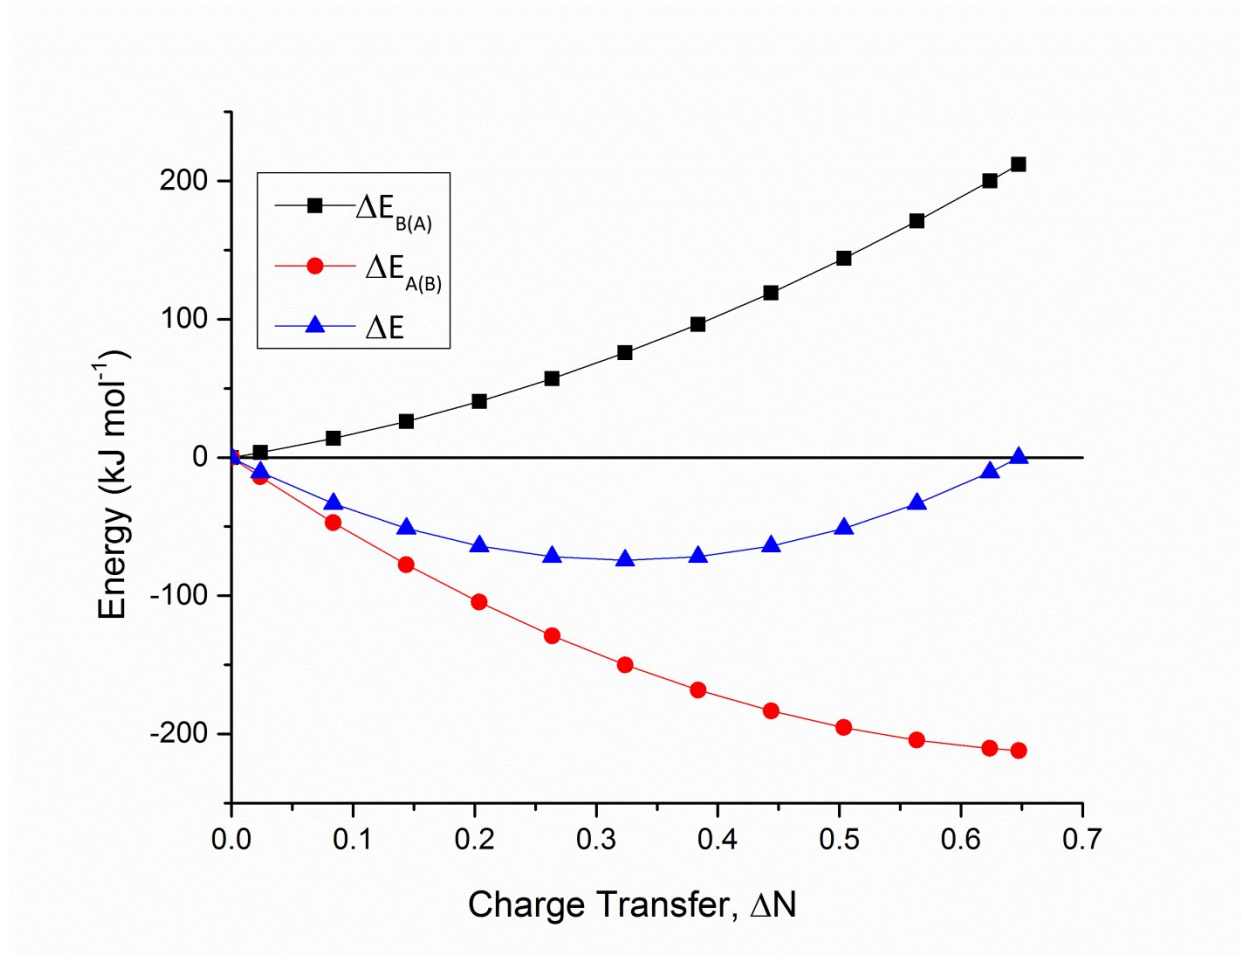

**Figure S10.** Plot showing the profiles of  $\Delta E_{B(A)}$ ,  $\Delta E_{A(B)}$  and  $\Delta E$  with respect to  $\Delta N$  for dimethylamine (B) and trifluoroborane (A).

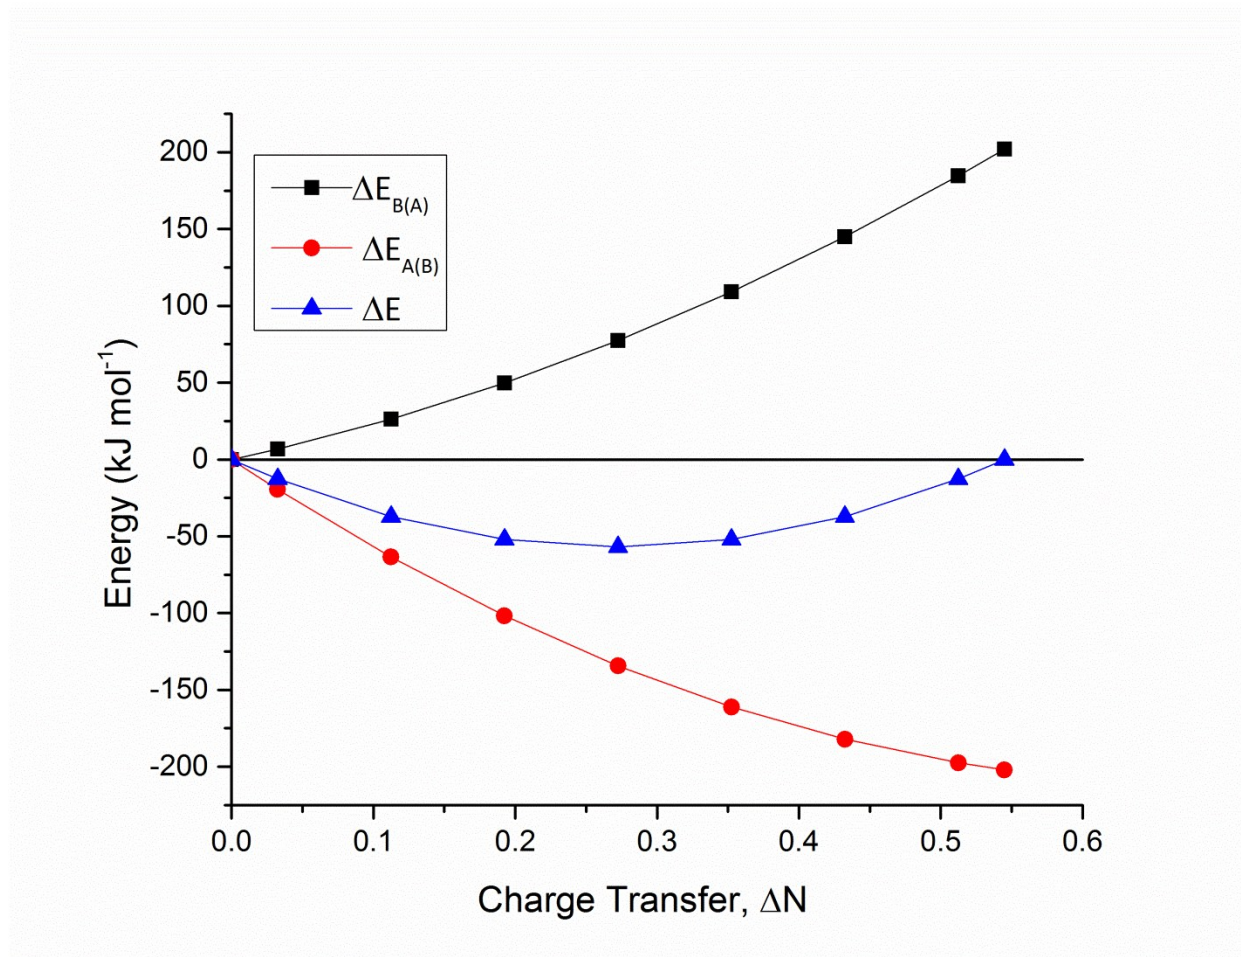

**Figure S11.** Plot showing the profiles of  $\Delta E_{B(A)}$ ,  $\Delta E_{A(B)}$  and  $\Delta E$  with respect to  $\Delta N$  for trimethylamine (B) and trifluoroborane (A).

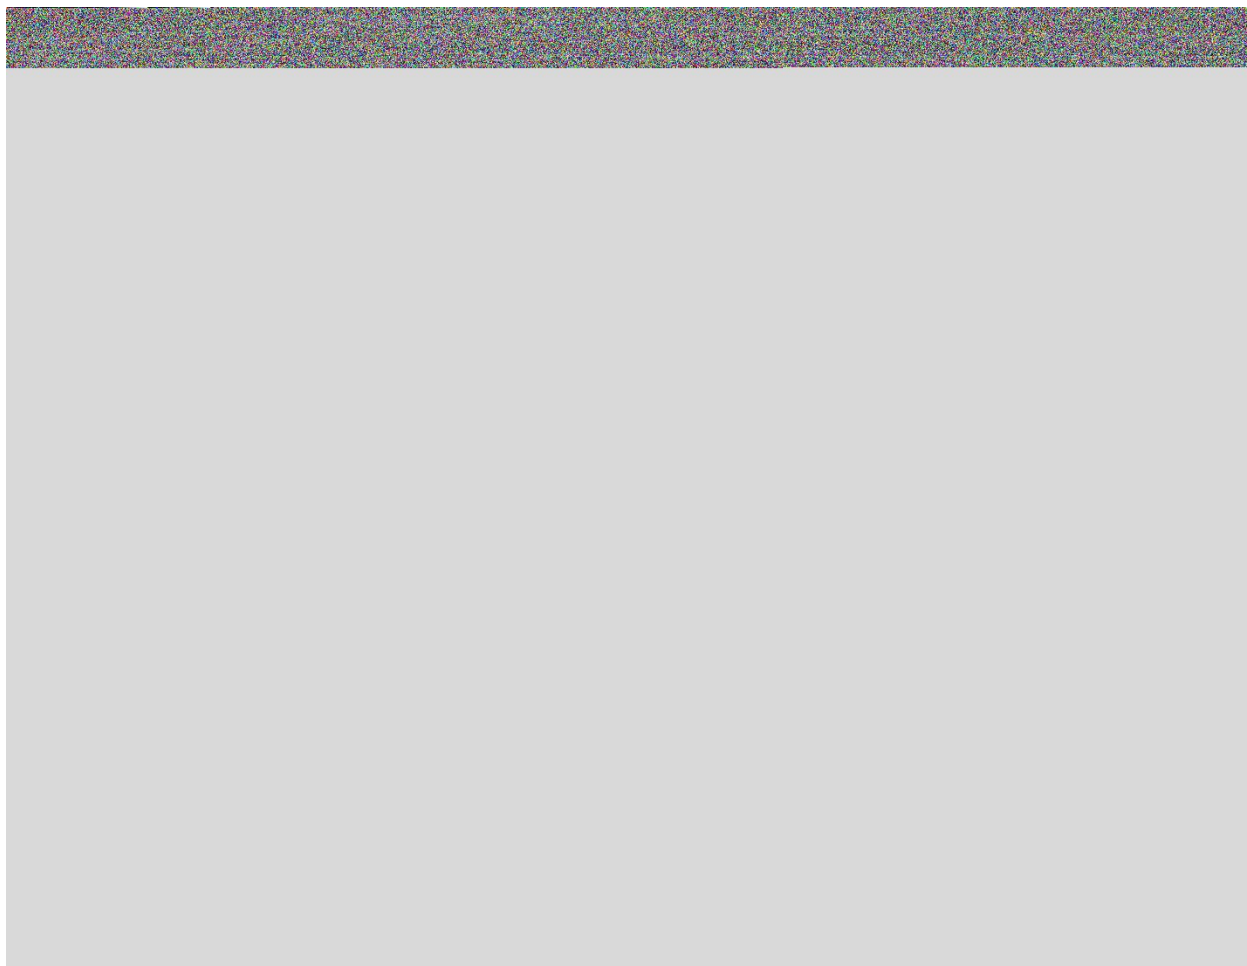

Supplement: c7cp01208j1.pdf [file c7cp01208j1.pdf]
